# Supplementary material for: High lncSNHG15 expression may predict poor cancer prognosis: a meta-analysis based on the PRISMA and the bio-informatics analysis
Source: PubMed Central journal article supplement (PMC7369394; doi:10.1042/bsr20194468), 2020-07-17
Supplement: BSR-2019-4468_supp.pdf [file BSR-2019-4468_supp.pdf]

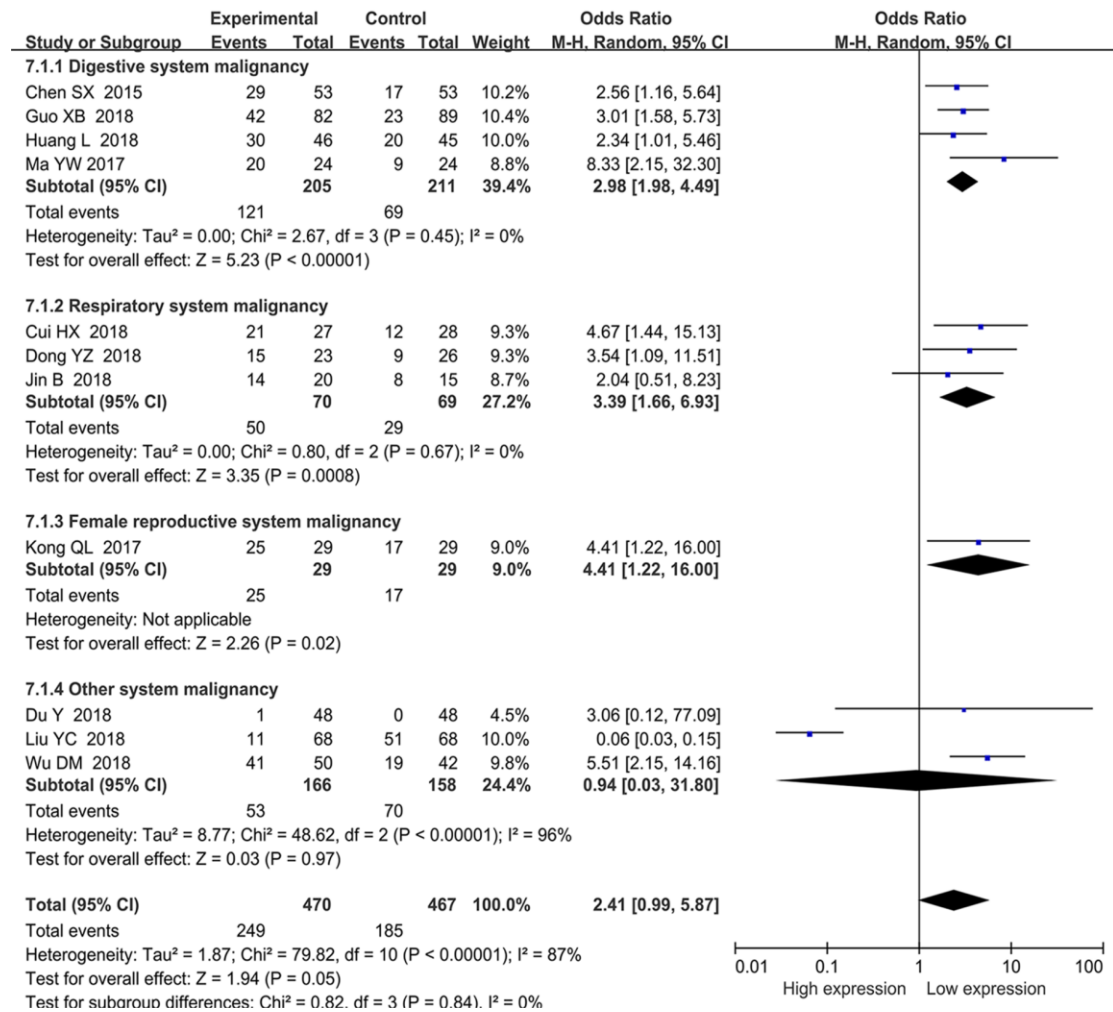

**Fig. S1.** Forest plot about the relationship between SNHG15 expression and the lymph node metastasis.

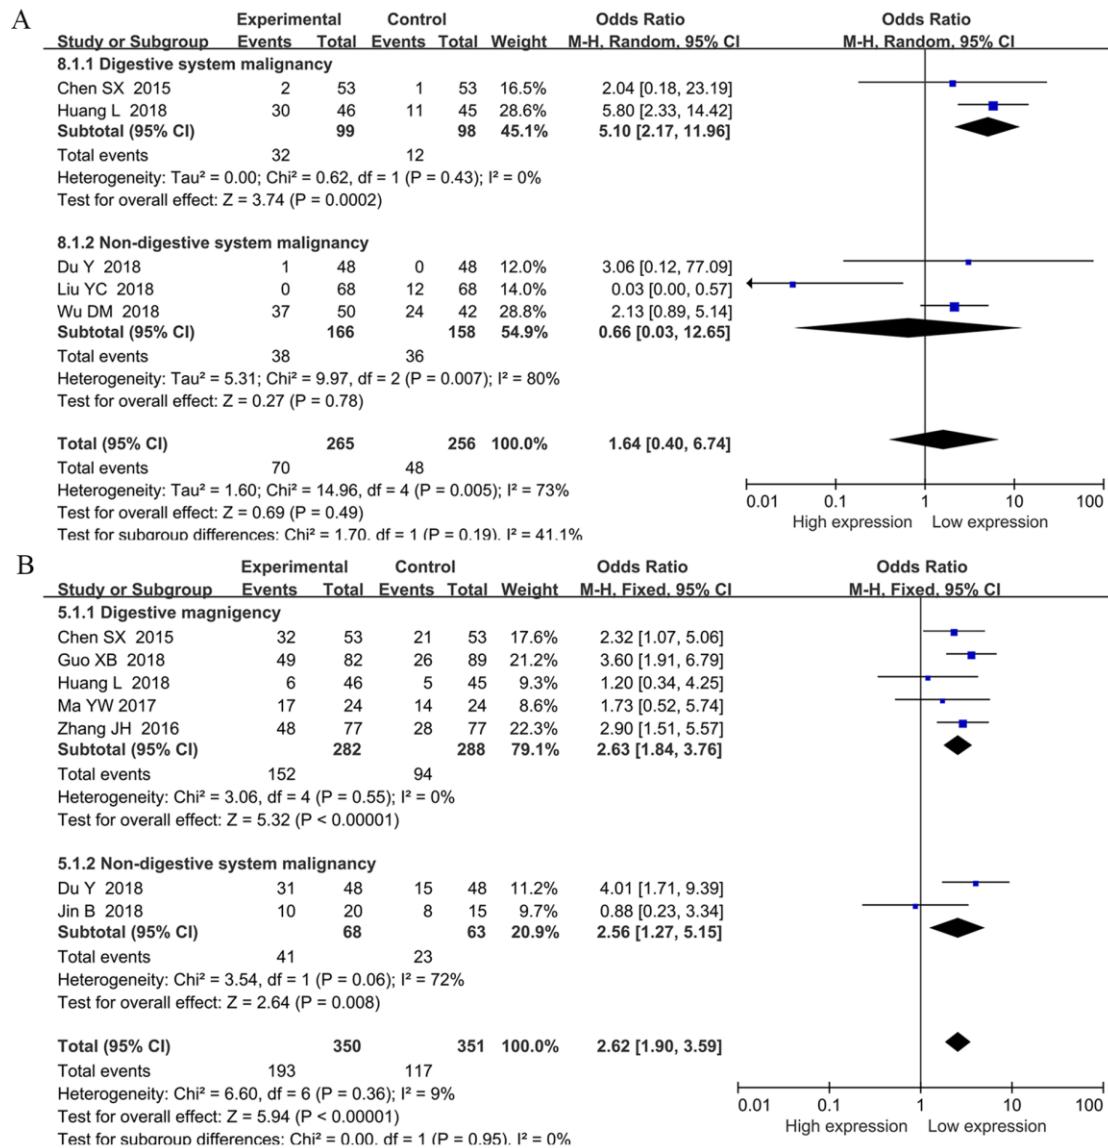

**Fig. S2.** Forest plot about the relationship between SNHG15 expression and distant metastasis (A) and histologic grade (B).

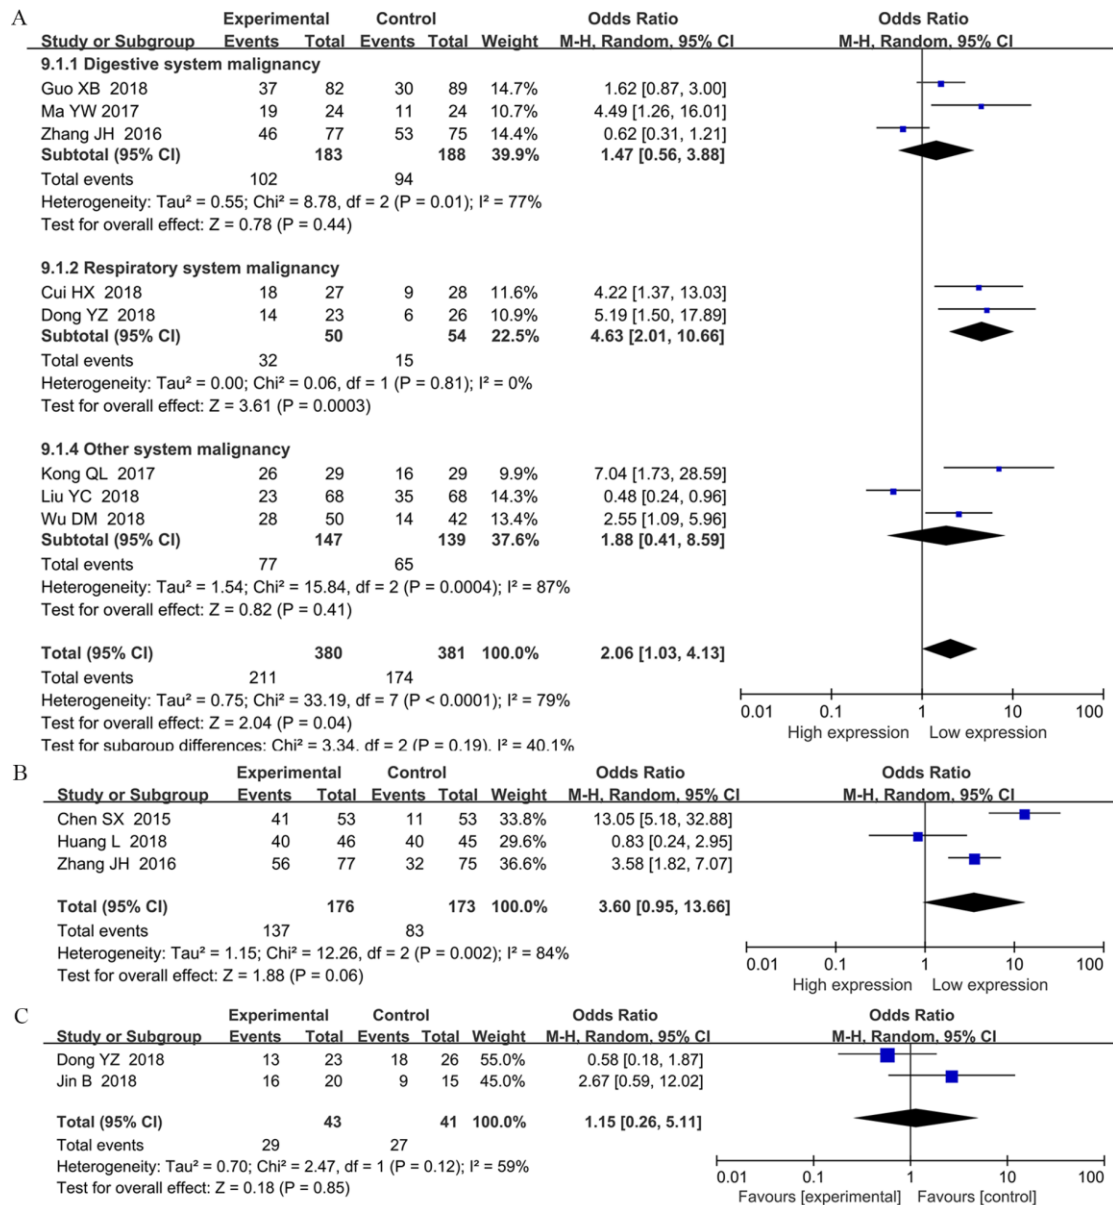

**Fig. S3.** Forest plot about the relationship between SNHG15 expression and depth of invasion (A), tumor size (B) and smoking (C).

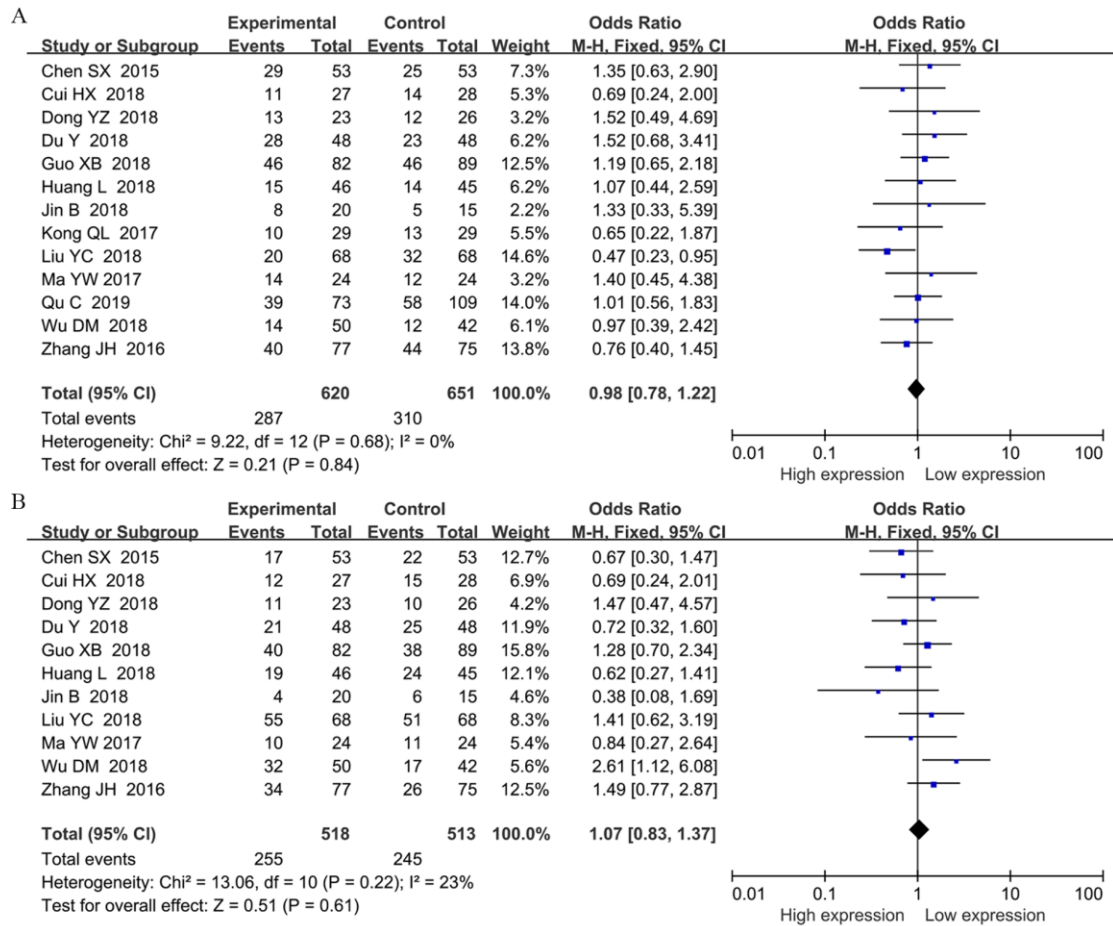

**Fig. S4.** Forest plot about the relationship between SNHG15 expression and age (older vs. young) (A) and gender (female vs. male) (B).

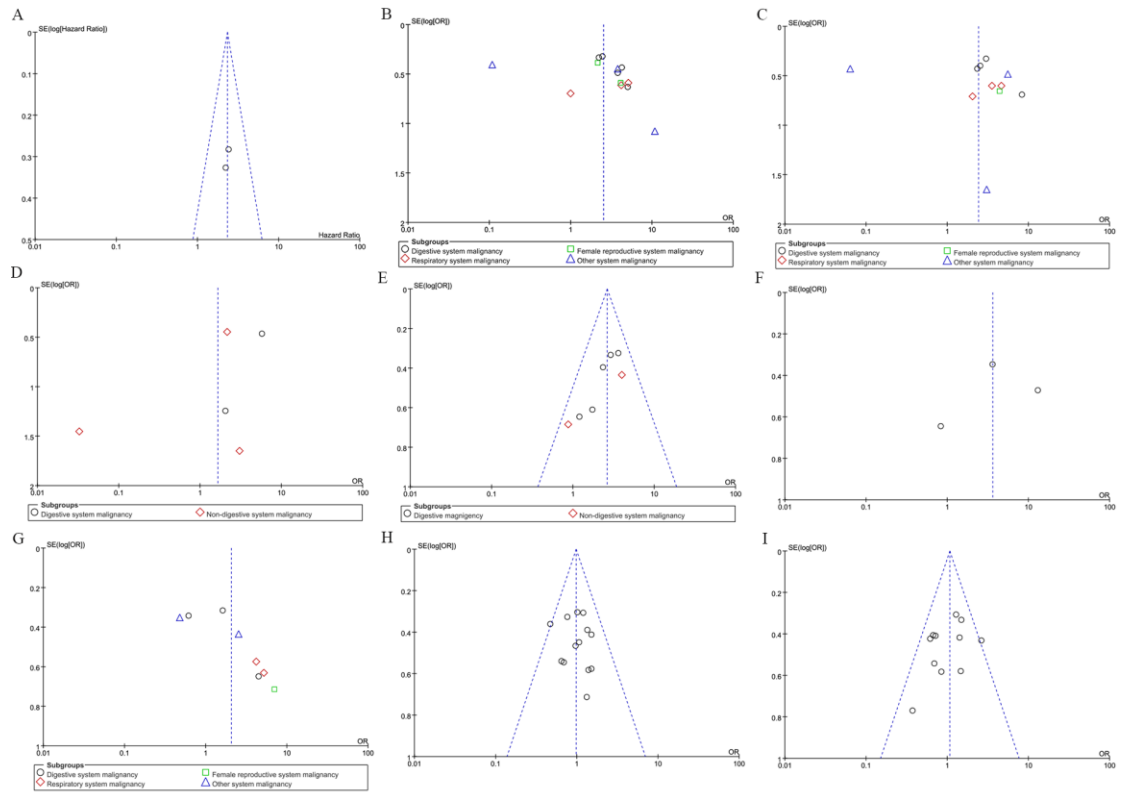

**Fig. S5.** Funnel plot for the correlation between SNHG15 expression level and different prognosis indicators. DFS (A) .TNM stage (B) .Lymph node metastasis (C) . Distant metastasis (D). Histologic grade (E). depth of invasion (F). Tumor size (G). age (H). Gender (I).

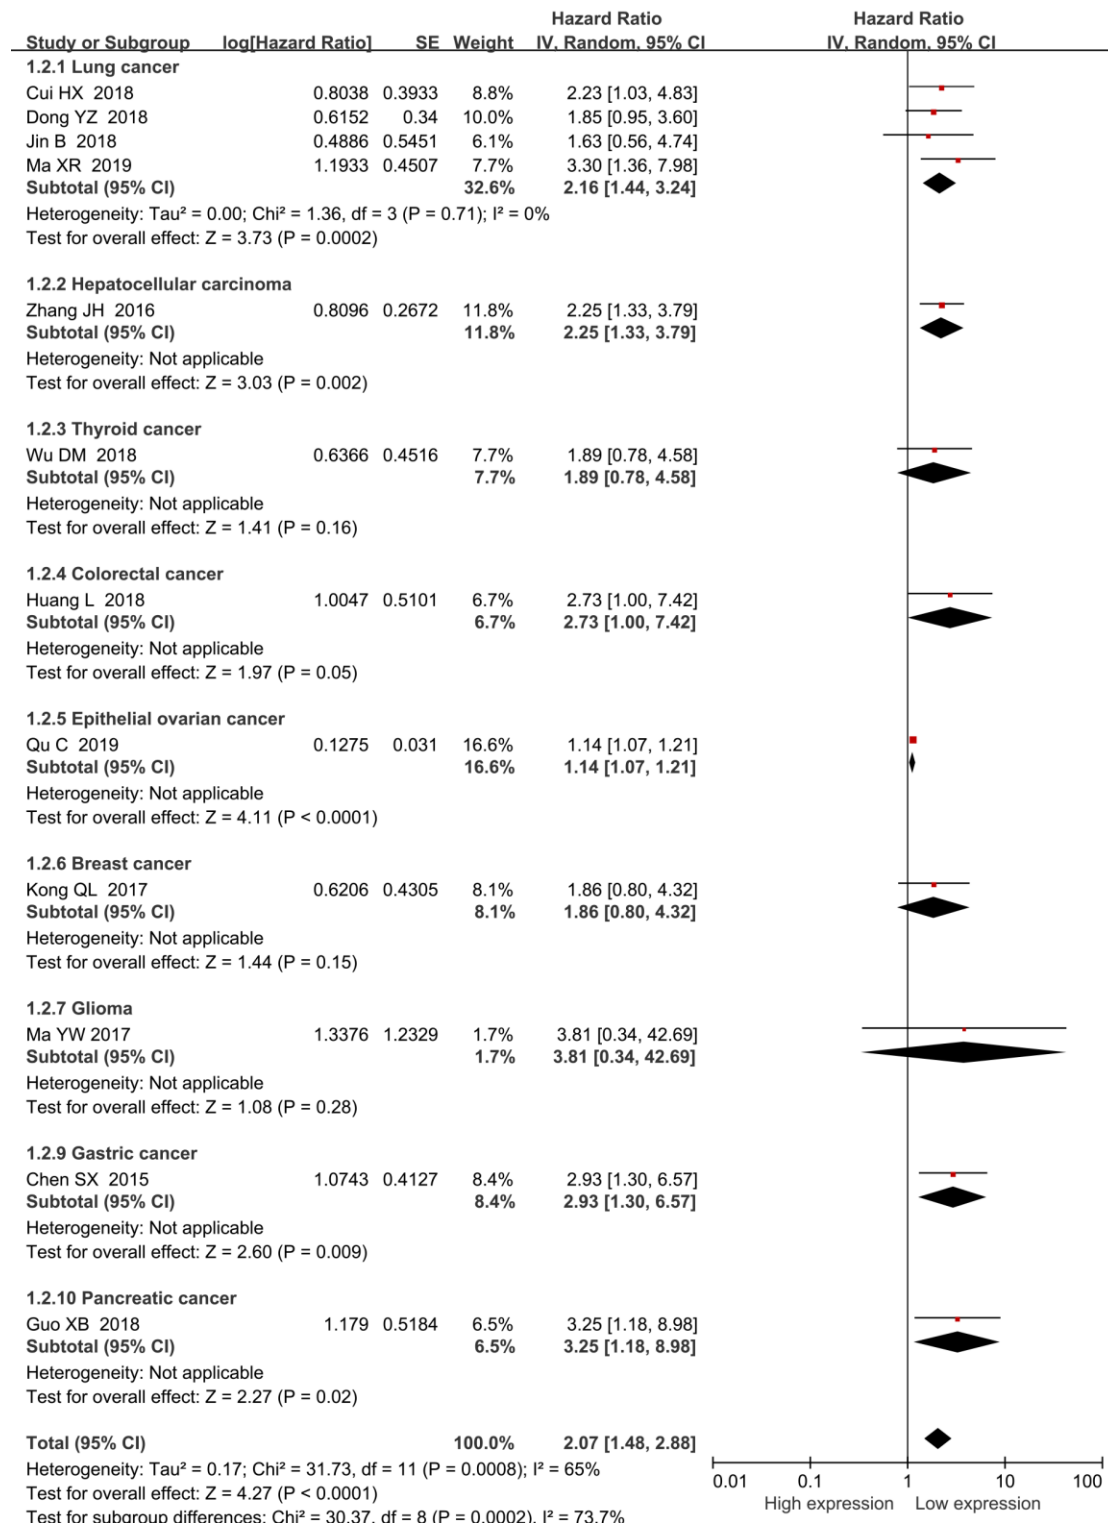

**Fig. S6.** Forest plot about the relationship between SNHG15 expression and OS in different cancer types.
